# Supplementary material for: Transcriptome Analysis Revealed the Mechanisms Involved in Ultrasonic Seed Treatment-Induced Aluminum Tolerance in Peanut
Source: Front Plant Sci. 2022 Feb 8;12:807021. doi: 10.3389/fpls.2021.807021 (PMC8861904; doi:10.3389/fpls.2021.807021)
Supplement: Supplementary file 1 [file Data_Sheet_1.xlsx]

## Sheet: Sheet1
Table S1 Primer sequences of genes
Gene name	Primer sequences
FRDL1	F 5’-TGATGCTGAAACCAAAGAGTTCCTACC-3’
	R 5’-CAGATGAAGCCGAAGGGATATGCC-3’
ALMT9	F 5’-ACCACACTCTCTCCCTCCAAATCC-3’
	R 5’-ACAGCAGCCTCTCCTTCTTCTCC-3’
WRKY1	F 5’-TTGCTTGGATACTTGGATTGGACTCTC-3’
	R 5’-TGGTTGGTTGGTTGGTTGAATTGAATG-3’
WRKY23	F 5’-AAGCGTGTGGAGCGGTCATTTAC-3’
	R 5’-AATGGCTGAACGAGGCATAACTGG-3’
WRKY44	F 5’-ACAGTCACAGCATTACACCACCTTC-3’
	R 5’-AGCCTTCTGATCCTCCTCTATGTTCTG-3’
OFP1	F 5’-ACCCCAAAGATTCACCACCACAAAG-3’
	R 5’-AGAAGAGACAGAGGAGGAGGAAGTAAC-3’
OFP13	F 5’-GGAGATGGTTGAGTGTCATGGAGTG-3’
	R 5’-GAAGCAGAAGCAGCAATGGTGATAATC-3’
bZIP60	F 5’-AACCATGCTTTGCGTCTTTGCTTAC-3’
	R 5’-AGTCAATGTGTTACTGTAGGGCTTACC-3’
AP2-AIL5	F 5’-TGGCAATGGCATGATGGACTTCTC-3’
	R 5’-ACCACCACTCTCTTGTTGATGATGATG-3’
AP2-ANT	F 5’-CTTCAAGCACTGCCTCAACAACAAG-3’
	R 5’-GCCAGAGAAGGAGAAGAATGAAAGGG-3’
NAC29	F 5’-TGGTCATGCCGTTGCGTTCTAC-3’
	R 5’-ACCACCCTCACTCACATCGTCTC-3’
NAC56	F 5’-TTCTGGAAGGTATGATGCTAGGAGGAG-3’
	R 5’-TGTTAATGGTGTTTGAGGCTGATCCC-3’
bHLH13	F 5’-TGCTGTTAGGAAGATGGAGGAGAGG-3’
	R 5’-GATGAAGACCATTGCGAGGAGGAC-3’
bHLH18	F 5’-GCCACCACCAGAAACCCAAC-3’
	R 5’-AGTCCAGGAACAATGGCGGA-3’
bHLH30	F 5’-TCACGGCGGACGAAGAAGATTATTC-3’
	R 5’-AGCAGATTCATCACCACCACCTTTC-3’
bHLH96	F 5’-GGACATAGAAGTGACAATGGTGGACAG-3’
	R 5’-AGGTGGAGAATGGTGAGGCTTAGAG-3’
bHLH115	F 5’-GGACATAGATTCTTCAGGAGGCACATC-3’
	R 5’-CAGCCAGGTGAAAGCAGCAGAG-3’
bHLH122	F 5’-ATGTTGTTGATATGCGAGGGATGGG-3’
	R 5’-GAGGCGGAGGAGGAGTAGTTCTG-3’
MYB14	F 5’-AACCTGCACCGTGTCTGATGTTG-3’
	R 5’-AAGCCGAATGTCTTGATGGAGTCTG-3’
MYB44	F 5’-GACCCGTTGACTGCGTTGACTC-3’
	R 5’-CTCACTTCCCTGGCAATCACATCC-3’
Actin	F 5’-AAGCTGGCTTACATTGCCCT-3’
	R 5’-TGACCTGTCCATCAGGCAAC-3’
